# Supplementary material for: Dual-regulation of ions/electrons in a 3D Cu–CuxO host to guide uniform lithium growth for high-performance lithium metal anodes
Source: Royal Society of Chemistry journal article supplement (doi:10.1039/d1ta01150b), 2021-01-01
Supplement: d1ta01150b1.pdf [file d1ta01150b1.pdf]

## Supporting Information

### Dual-Regulation of Ion/Electron in 3D Cu-Cu<sub>x</sub>O host to Guide Uniform Lithium Growth for High-Performance Lithium Metal Anodes

Ruichao Lu,<sup>a,b</sup> Binbin Zhang,<sup>a</sup> Yueli Cheng,<sup>a</sup> Kamran Amin,<sup>a,b</sup> Chen Yang,<sup>a,b</sup> Qiaoyang Zhou,<sup>a</sup> Lijuan Mao\*<sup>a</sup> and Zhixiang Wei\*<sup>a,b</sup>,

<sup>a</sup> National Center for Nanoscience and Technology, Beijing 100190, P. R. China

<sup>b</sup> University of Chinese Academy of Sciences, Beijing 100049, P. R. China

\* Corresponding author.

*E-mail address:* maolj@nanoctr.cn; weizx@nanoctr.cn

#### Contents:

1. Fig. S1-S21, additional Figures
2. Table S1, additional table
3. Video S1 and S2, Li-infusing experiment
4. Video S3 and S4, In-situ optical microscopy observation of Li deposition

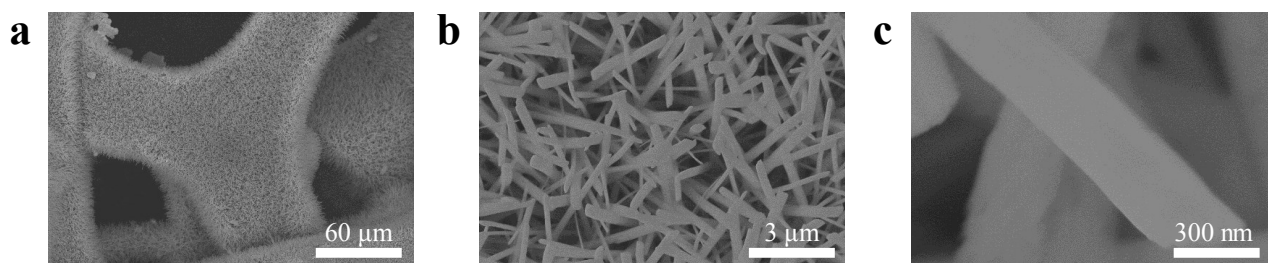

**Fig. S1.** a) SEM image of the Cu-Cu(OH)<sub>2</sub>. b-c) SEM images of solid Cu(OH)<sub>2</sub> nanowires with different magnification.

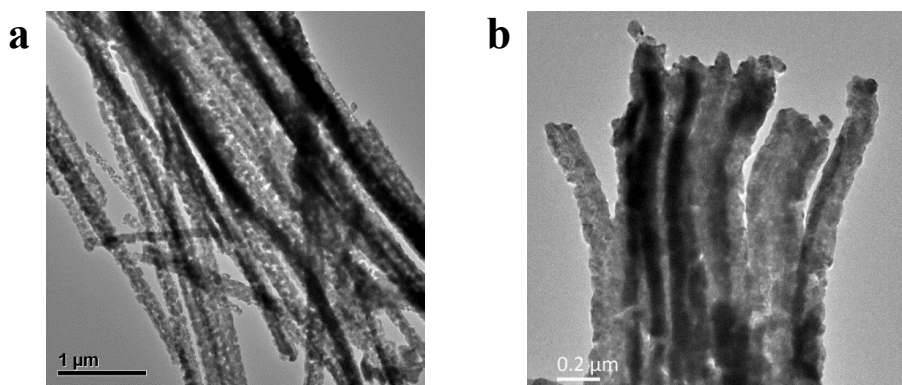

**Fig. S2.** TEM images of porous  $\text{Cu}_x\text{O}$  nanowires with different magnification.

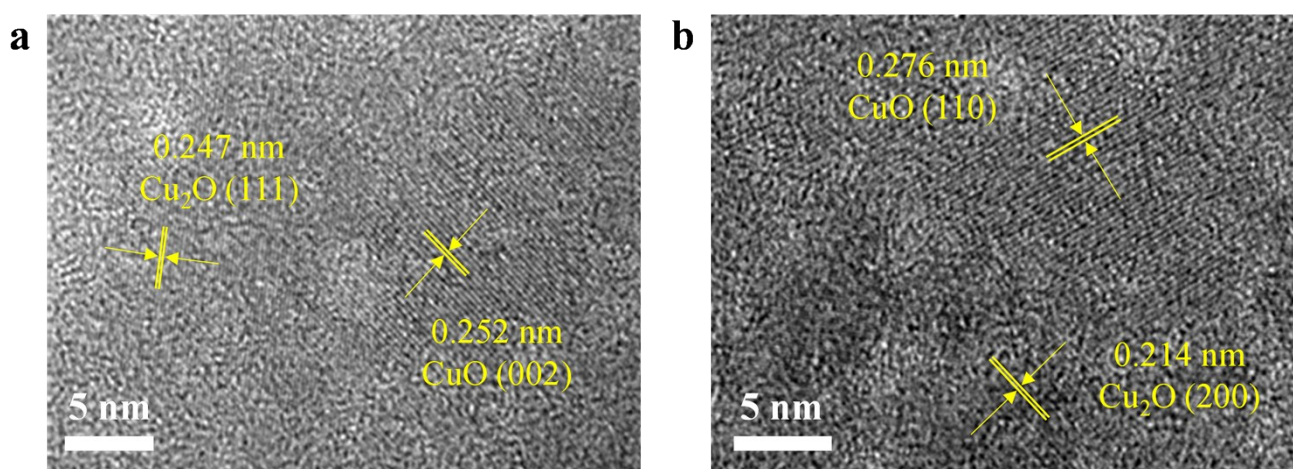

**Fig. S3.** HR-TEM images of  $\text{Cu}_x\text{O}$  nanowires.

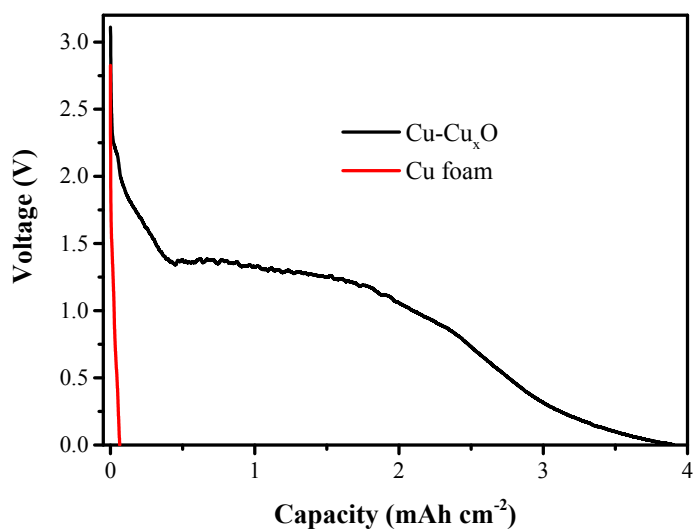

**Fig. S4.** Initial discharge profile of the  $\text{Cu-Cu}_x\text{O}$  and  $\text{Cu foam}$ .

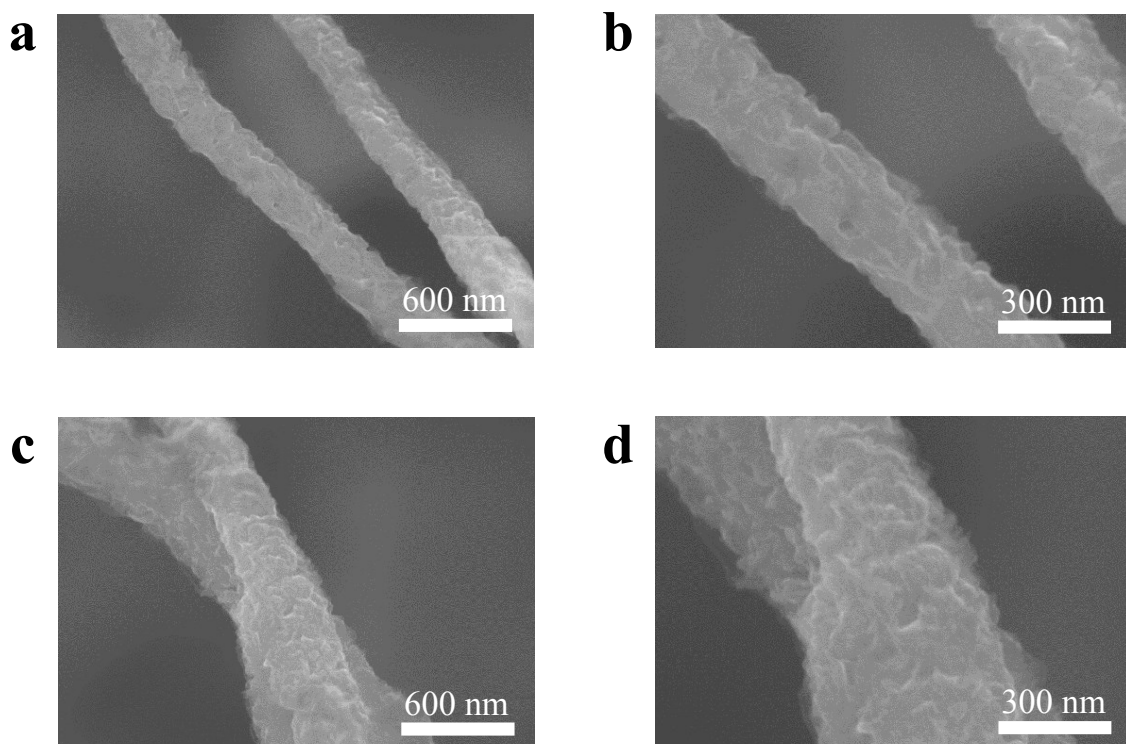

**Fig. S5.** SEM images of the Cu-Cu<sub>x</sub>O after the lithiation reaction.

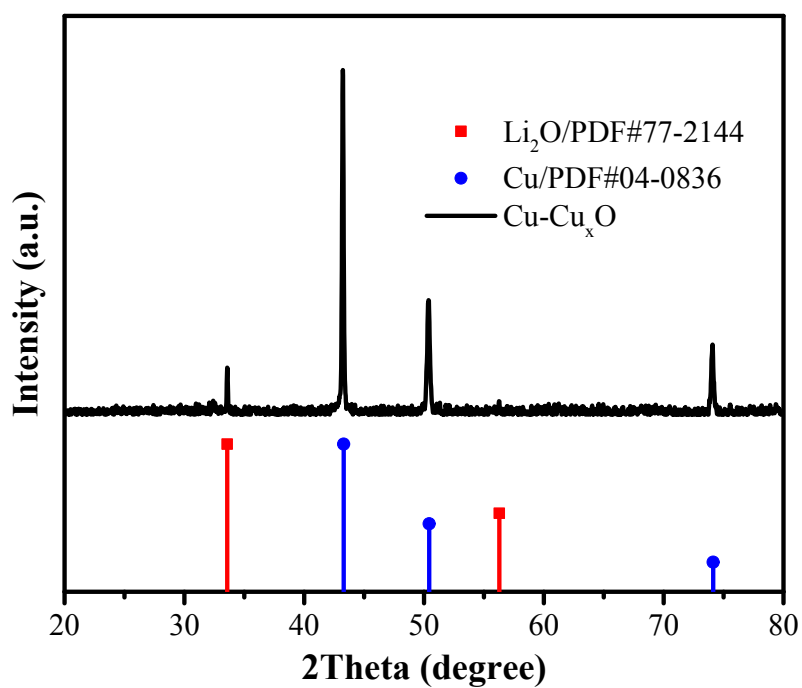

**Fig. S6.** XRD pattern of the Cu-Cu<sub>x</sub>O host after cycling.

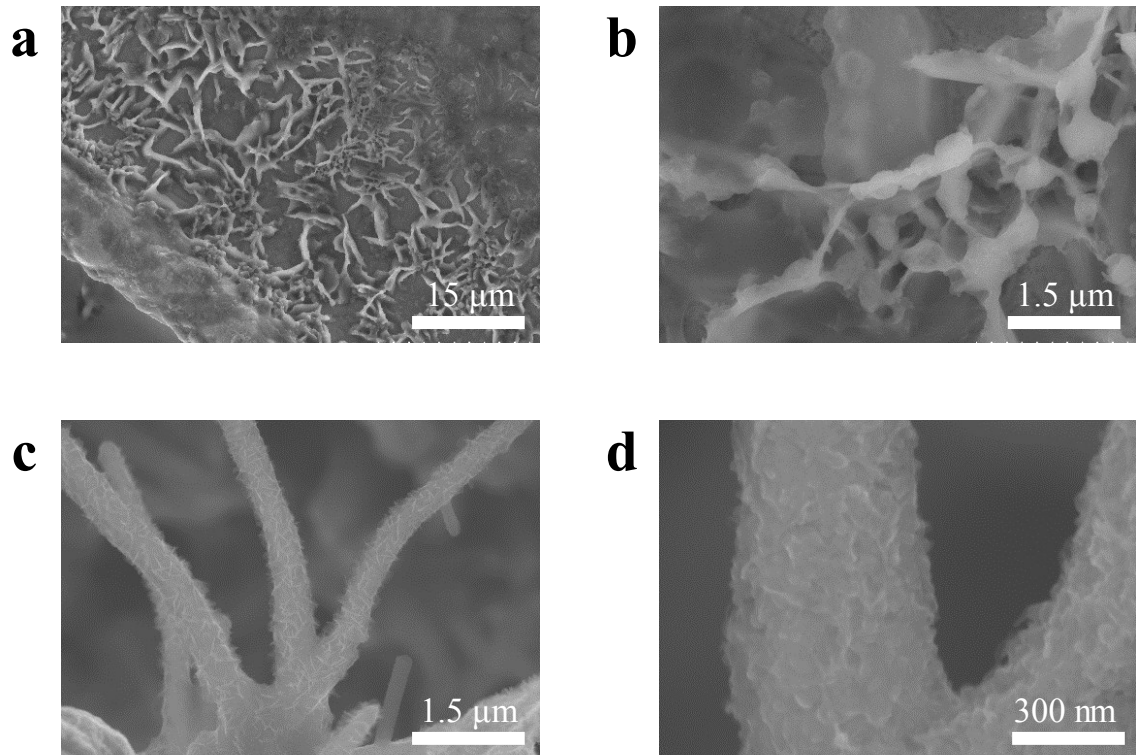

**Fig. S7.** a-b) SEM images of Cu foam after plating  $0.05 \text{ mAh cm}^{-2}$  Li. c-d) SEM images of the  $\text{Cu-Cu}_x\text{O}$  after plating  $0.05 \text{ mAh cm}^{-2}$  Li.

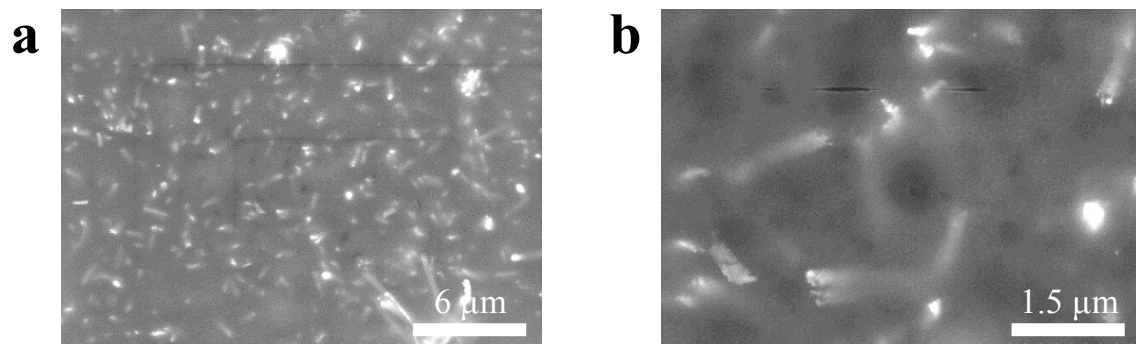

**Fig. S8.** SEM images of the  $\text{Cu-Cu}_x\text{O}$  after plating  $10 \text{ mAh cm}^{-2}$  Li.

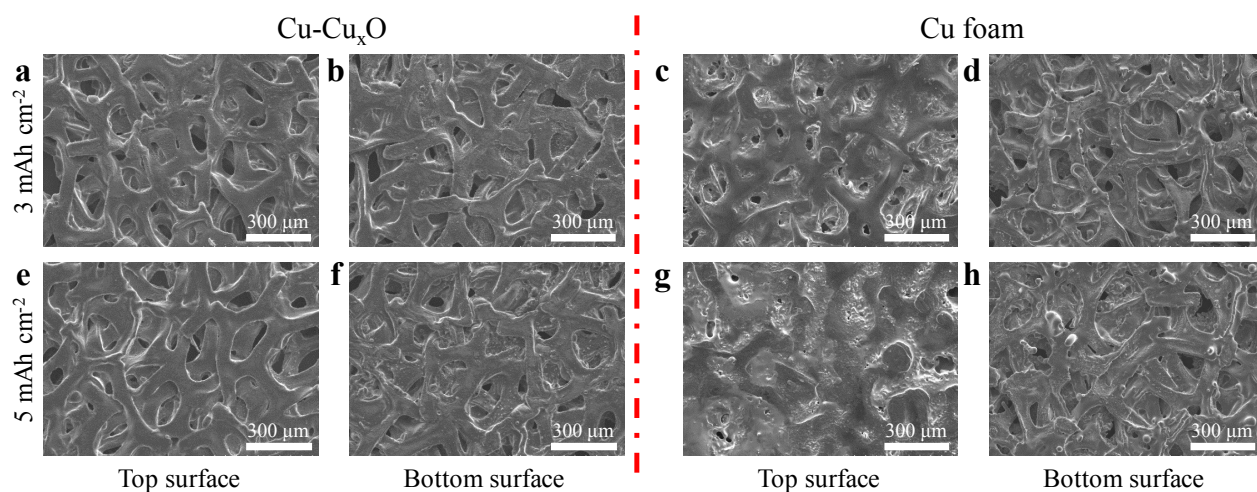

**Fig. S9.** SEM images of the a) top surface and b) bottom surface of the Cu-Cu<sub>x</sub>O after plating 3 mAh cm<sup>-2</sup> Li. SEM images of the c) top surface and d) bottom surface of Cu foam after plating 3 mAh cm<sup>-2</sup> Li (Inset is the corresponding optical photo). SEM images of the e) top surface and f) bottom surface of the Cu-Cu<sub>x</sub>O after plating 5 mAh cm<sup>-2</sup> Li. SEM images of the g) top surface and h) bottom surface of Cu foam after plating 5 mAh cm<sup>-2</sup> Li (Inset is the corresponding optical photo).

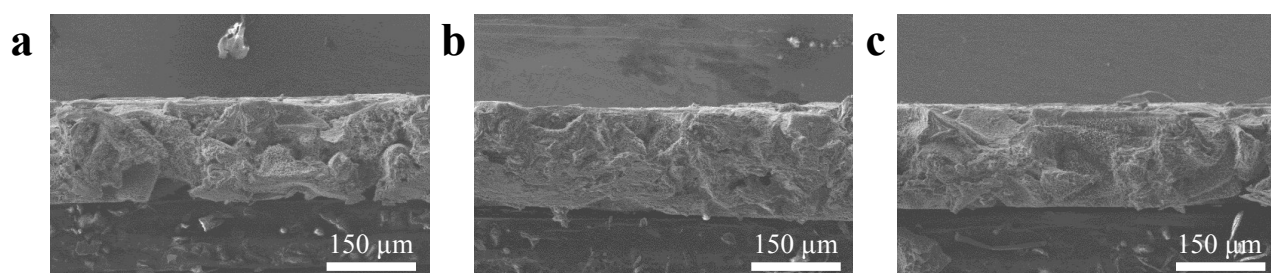

**Fig. S10.** Cross-section SEM images of the Cu-Cu<sub>x</sub>O after plating a) 1 mAh cm<sup>-2</sup>, b) 3 mAh cm<sup>-2</sup> and c) 5 mAh cm<sup>-2</sup> Li.

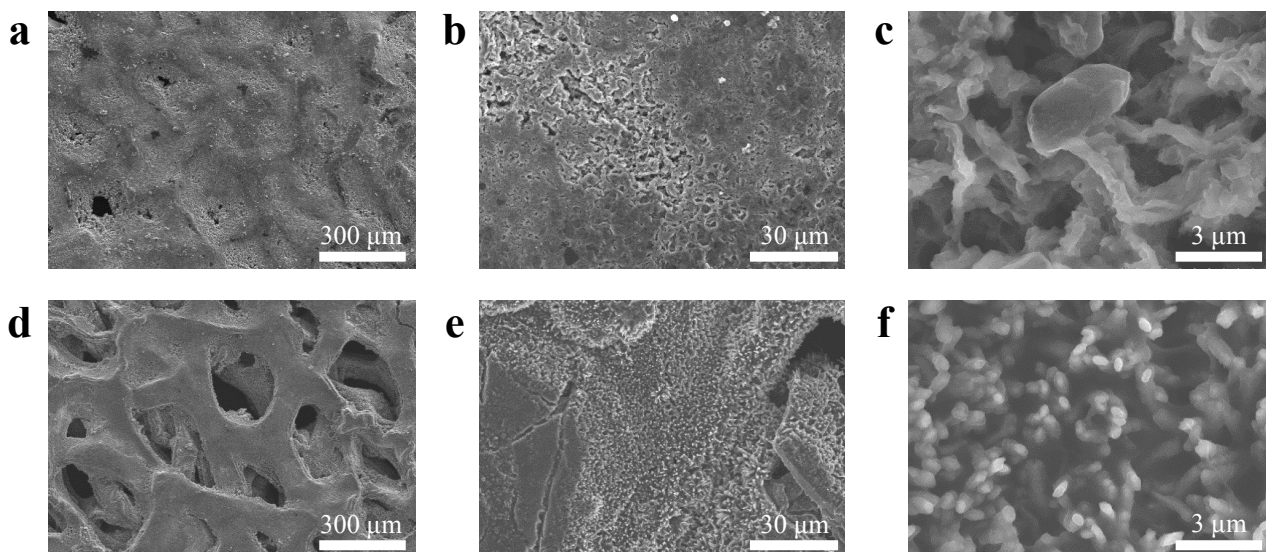

**Fig. S11.** a-c) SEM images of Cu foam after 50 cycles with different magnification. d-f) SEM images of the Cu-Cu<sub>x</sub>O after 50 cycles with different magnification.

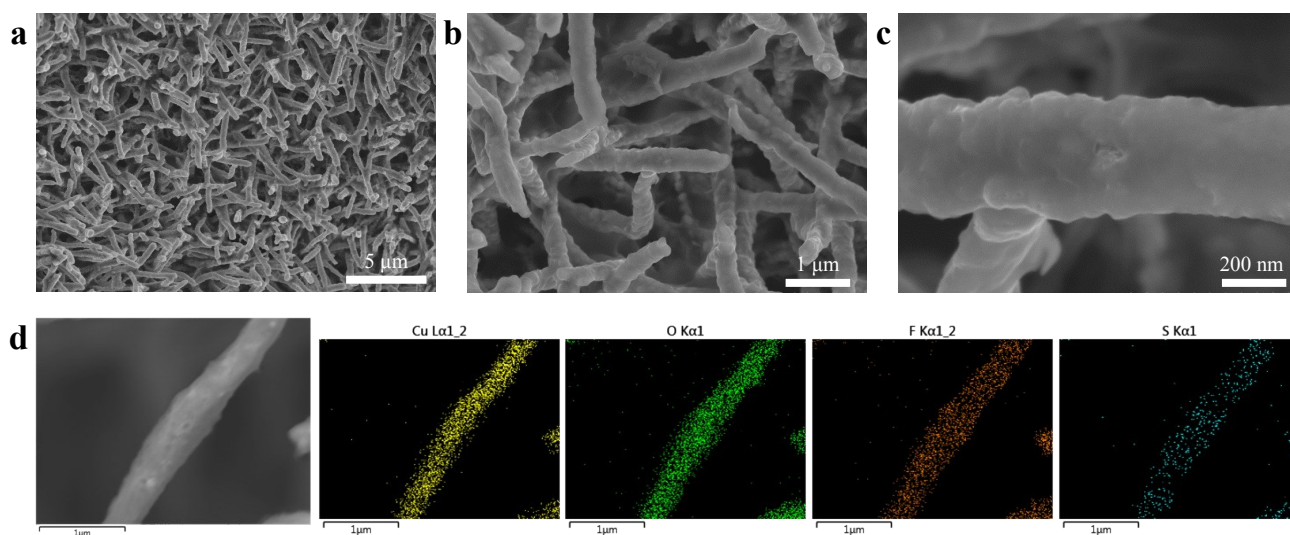

**Fig. S12.** (a-c) SEM images of the 3D Cu-Cu<sub>x</sub>O host after cycling. (d) EDS mapping images of the nanowires after cycling.

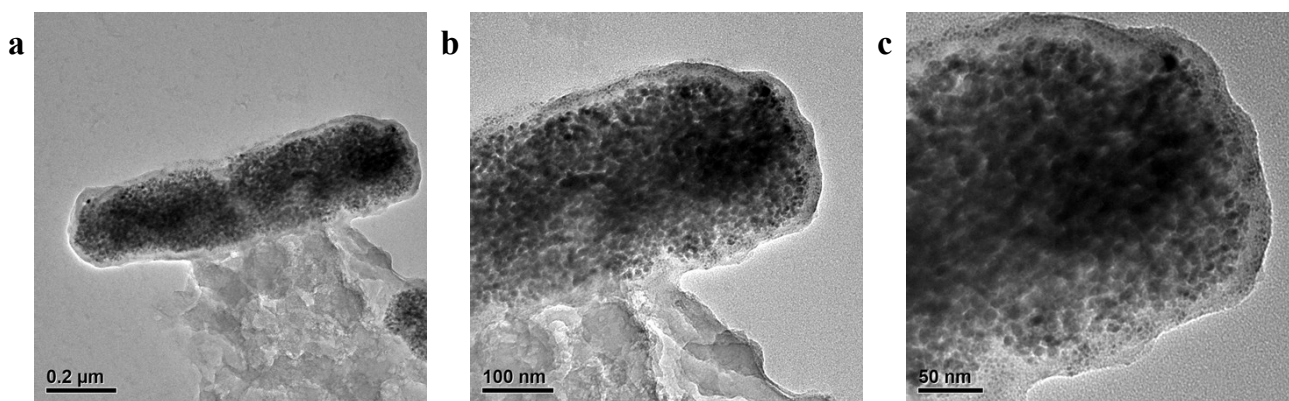

**Fig. S13.** TEM images of the nanowires after cycling with different magnification.

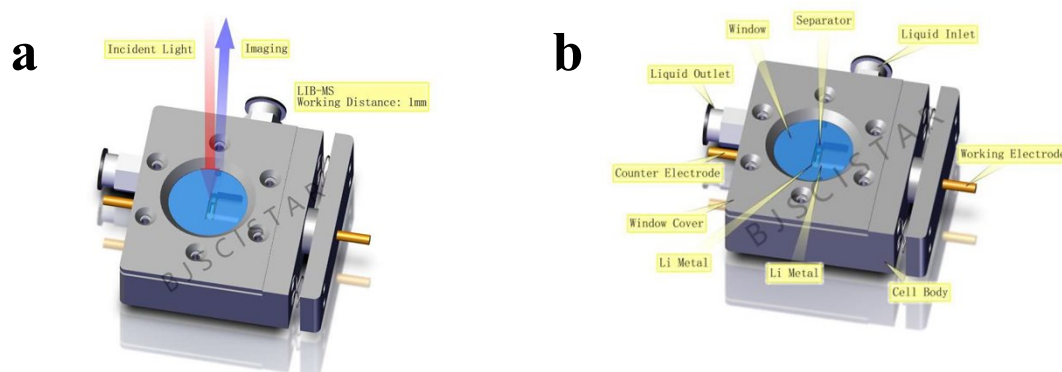

**Fig. S14.** Schematic illustration of the in-situ optical microscopy observation device.

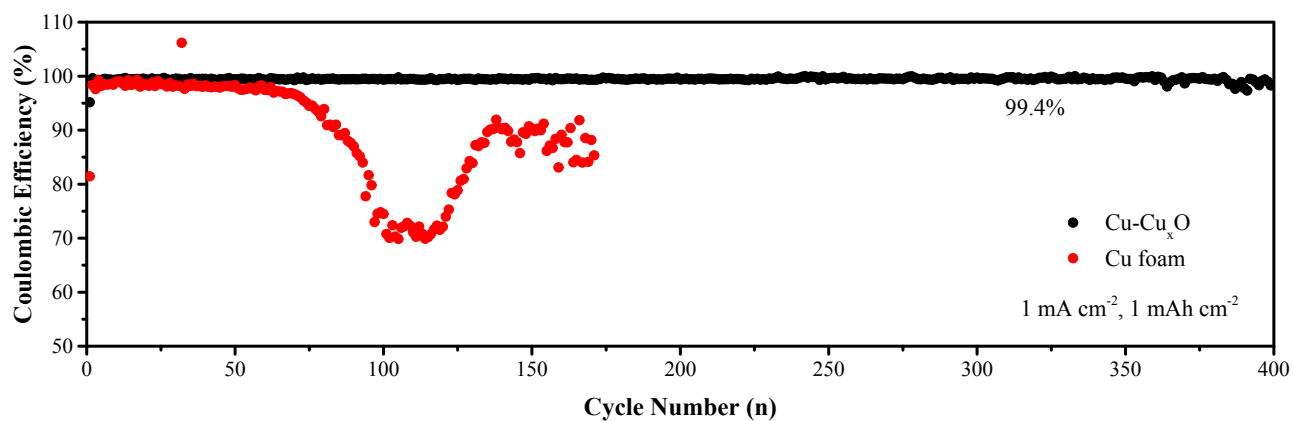

**Fig. S15.** Long-term CE of the Cu-Cu<sub>x</sub>O host with areal capacity of 1 mAh cm<sup>-2</sup> at 1 mA cm<sup>-2</sup>.

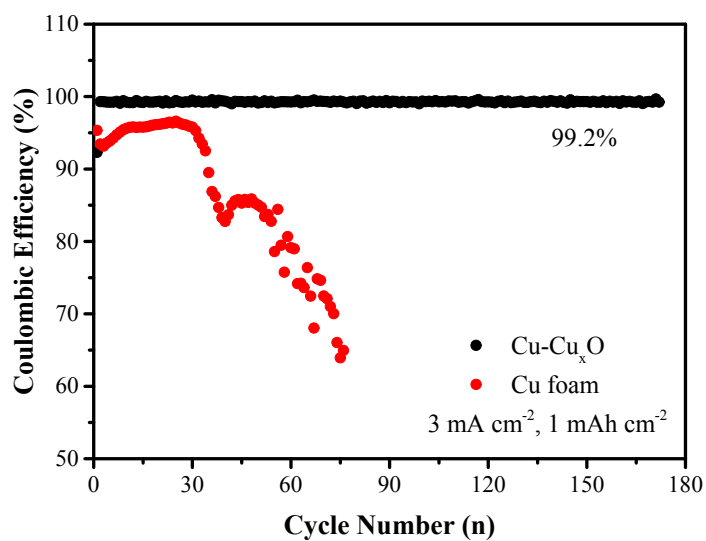

**Fig. S16.** CE of Li plating/stripping with areal capacity of 3 mAh cm<sup>-2</sup> at 1 mA cm<sup>-2</sup>.

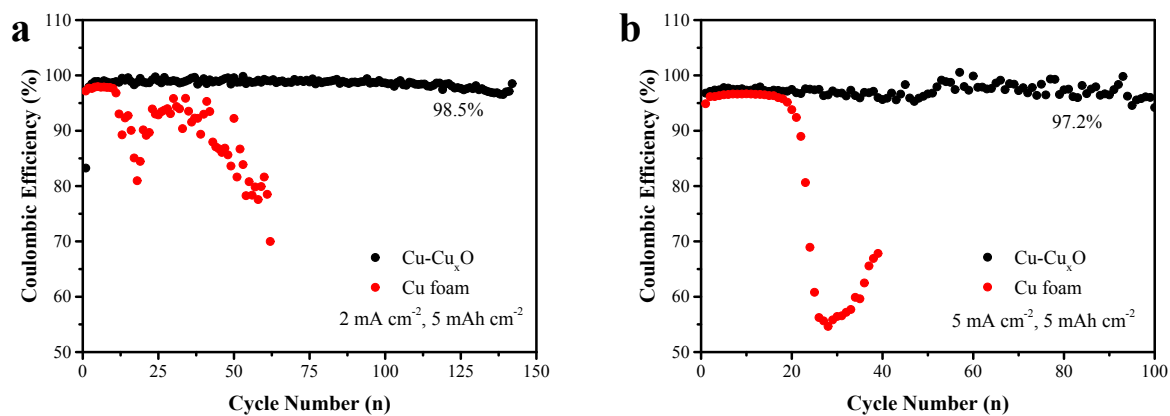

**Fig. S17.** CE of Li plating/stripping with a) areal capacity of 2 mAh cm<sup>-2</sup> at 5 mA cm<sup>-2</sup> and b) areal capacity of 5 mAh cm<sup>-2</sup> at 5 mA cm<sup>-2</sup>.



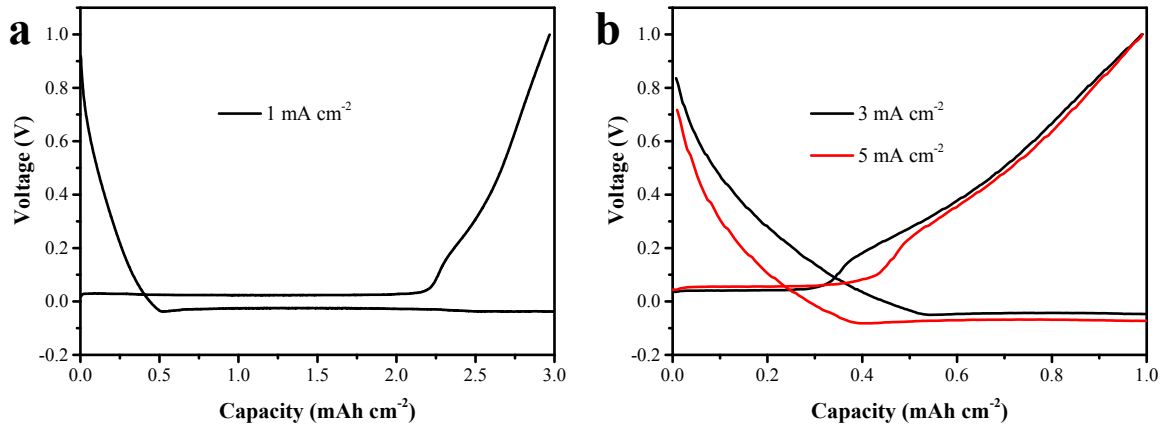

**Fig. S18.** a) Voltage profile of Li plating/stripping on the Cu-Cu<sub>x</sub>O with areal capacity of 3 mAh cm<sup>-2</sup> at 1 mA cm<sup>-2</sup>. b) Voltage profile of Li plating/stripping on the Cu-Cu<sub>x</sub>O with areal capacity of 1 mAh cm<sup>-2</sup> at 3 mA cm<sup>-2</sup> and 5 mA cm<sup>-2</sup>.

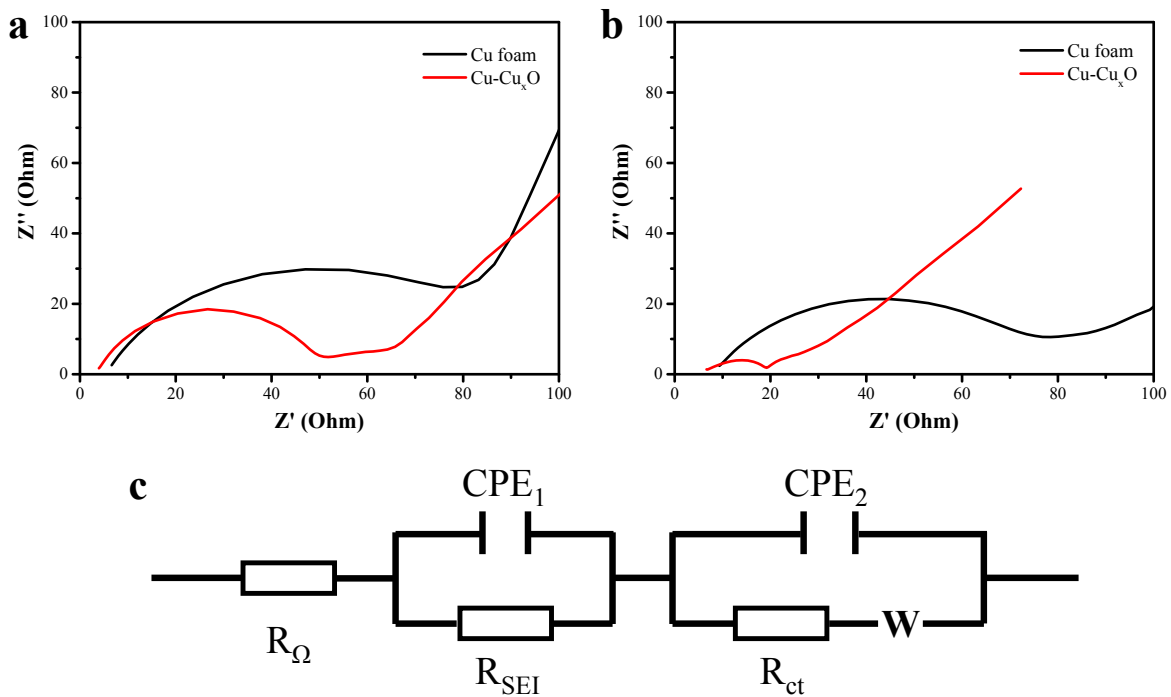

**Fig. S19.** The EIS profile of Cu foam and the Cu-Cu<sub>x</sub>O host. a) Freshly assembled coin cell before lithiation. b) Coin cell after lithiation. c) Equivalent circuit diagram to simulate Nyquist plots of Cu-Cu<sub>x</sub>O host.

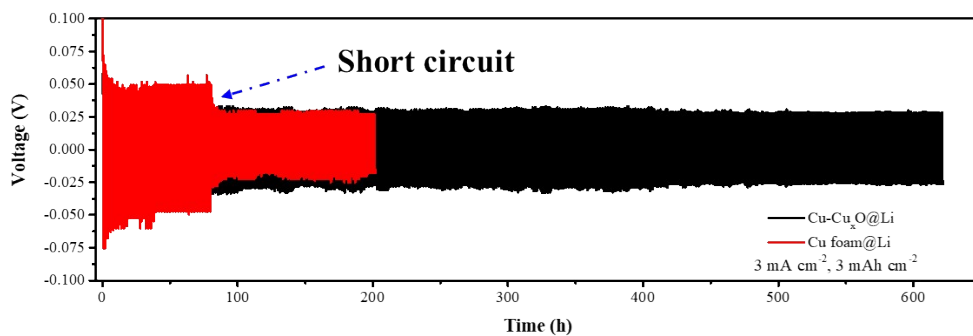

**Fig. S20.** Voltage profiles of Li plating/stripping with areal capacity of  $3 \text{ mAh cm}^{-2}$  at  $3 \text{ mA cm}^{-2}$ .

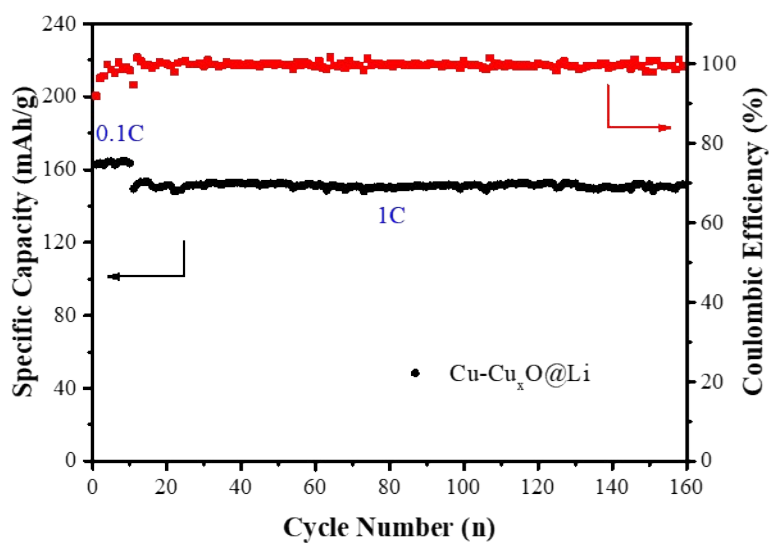

**Fig. S21.** Long-term cycling performance of  $\text{Cu-Cu}_x\text{O@Li}$  anode.

**Table S1.** Comparison of CE between 3D Cu-Cu<sub>x</sub>O and other metal-based current collectors in the literatures.

| Current Collector                                   | Current Density         | Capacity                 | Cycle Number | CE (%) | Ref. |
|-----------------------------------------------------|-------------------------|--------------------------|--------------|--------|------|
| Cu Nanowires (Cu NWs)                               | 1 mA cm <sup>-2</sup>   | 2 mAh cm <sup>-2</sup>   | 200          | 98.6   | 1    |
|                                                     | 2 mA cm <sup>-2</sup>   | 2 mAh cm <sup>-2</sup>   | 50           | 97.6   |      |
|                                                     | 5 mA cm <sup>-2</sup>   | 2 mAh cm <sup>-2</sup>   | 50           | 97.1   |      |
| Chemical Dealloying 3D Porous Cu (3D-Cu)            | 0.5 mA cm <sup>-2</sup> | 1 mAh cm <sup>-2</sup>   | 240          | 97     | 2    |
|                                                     | 1 mA cm <sup>-2</sup>   | 1 mAh cm <sup>-2</sup>   | 140          | 97     |      |
| Carbon Modified Ni Foam (CMN)                       | 0.5 mA cm <sup>-2</sup> | 2 mAh cm <sup>-2</sup>   | 475          | 98     | 3    |
| O-CNT Modified Ni Foam (O-CNT)                      | 1 mA cm <sup>-2</sup>   | 2 mAh cm <sup>-2</sup>   | 200          | 99     | 4    |
| LCNM@Ni                                             | 2 mA cm <sup>-2</sup>   | 4 mAh cm <sup>-2</sup>   | 200          | 99     | 5    |
| Cu <sub>99</sub> Zn Foils (Cu <sub>99</sub> Zn)     | 0.2 mA cm <sup>-2</sup> | 0.4 mAh cm <sup>-2</sup> | 400          | 99     | 6    |
|                                                     | 0.5 mA cm <sup>-2</sup> | 1 mAh cm <sup>-2</sup>   | 200          | 97     |      |
| Vertical Graphene Nanowalls Modified Ni Foam (VGN)  | 0.5 mA cm <sup>-2</sup> | 1 mAh cm <sup>-2</sup>   | 250          | 97     | 7    |
| CNT Sponge on Cu Foil (C-host@Cu)                   | 1 mA cm <sup>-2</sup>   | 3 mAh cm <sup>-2</sup>   | 75           | 96     | 8    |
| 3D porous Cu skeleton (Cu skeleton)                 | 0.5 mA cm <sup>-2</sup> | 1 mAh cm <sup>-2</sup>   | 700          | 95     | 9    |
|                                                     | 1 mA cm <sup>-2</sup>   | 1 mAh cm <sup>-2</sup>   | 400          | 95     |      |
| Lithiophilic Cu-CuO-Ni Hybrid Structure (Cu-CuO-Ni) | 1 mA cm <sup>-2</sup>   | 1 mAh cm <sup>-2</sup>   | 200          | 95     | 10   |
| Graphene Coating on Cu Foam (GN@Cu)                 | 0.5 mA cm <sup>-2</sup> | 1 mAh cm <sup>-2</sup>   | 250          | 98.6   | 11   |
|                                                     | 2 mA cm <sup>-2</sup>   | 1 mAh cm <sup>-2</sup>   | 150          | 97.4   |      |
|                                                     | 5 mA cm <sup>-2</sup>   | 1 mAh cm <sup>-2</sup>   | 90           | 96.5   |      |
| VA-CuO on Cu Foil (VA-CuO-Cu)                       | 0.5 mA cm <sup>-2</sup> | 1 mAh cm <sup>-2</sup>   | 180          | 94     | 12   |
|                                                     | 1 mA cm <sup>-2</sup>   | 1 mAh cm <sup>-2</sup>   | 180          | 94     |      |
| N-doped Graphene Modified 3D Porous Cu (3DCu@NG)    | 0.5 mA cm <sup>-2</sup> | 1 mAh cm <sup>-2</sup>   | 150          | 97.5   | 13   |
|                                                     | 1 mA cm <sup>-2</sup>   | 2 mAh cm <sup>-2</sup>   | 50           | 97     |      |
|                                                     | 0.5 mA cm <sup>-2</sup> | 2 mAh cm <sup>-2</sup>   | 100          | 97.6   |      |
|                                                     | 0.5 mA cm <sup>-2</sup> | 4 mAh cm <sup>-2</sup>   | 100          | 97.8   |      |
| Compact 3D Cu (3D Cu)                               | 1 mA cm <sup>-2</sup>   | 1 mAh cm <sup>-2</sup>   | 200          | 97.9   | 14   |
| Zn/Cu <sub>0.7</sub> Zn <sub>0.3</sub> /CF (Cu-Zn)  | 1.5 mA cm <sup>-2</sup> | 1 mAh cm <sup>-2</sup>   | 300          | 98     | 15   |
|                                                     | 2.5 mA cm <sup>-2</sup> | 1.5 mAh cm <sup>-2</sup> | 150          | 97     |      |
|                                                     | 5 mA cm <sup>-2</sup>   | 3 mAh cm <sup>-2</sup>   | 50           | 96     |      |
| CuO@Ti-mesh (CTM)                                   | 1 mA cm <sup>-2</sup>   | 1 mAh cm <sup>-2</sup>   | 500          | 97.3   | 16   |
|                                                     | 5 mA cm <sup>-2</sup>   | 1 mAh cm <sup>-2</sup>   | 100          | 95     |      |
| Graphene on Cu Mesh (VGCM)                          | 2 mA cm <sup>-2</sup>   | 1 mAh cm <sup>-2</sup>   | 250          | 97     | 17   |
|                                                     | 3 mA cm <sup>-2</sup>   | 1 mAh cm <sup>-2</sup>   | 200          | 97     |      |
|                                                     | 5 mA cm <sup>-2</sup>   | 1 mAh cm <sup>-2</sup>   | 150          | 97     |      |
|                                                     | 1 mA cm <sup>-2</sup>   | 5 mAh cm <sup>-2</sup>   | 80           | 98     |      |

|                                                            |                         |                        |     |       |              |
|------------------------------------------------------------|-------------------------|------------------------|-----|-------|--------------|
| Cu <sub>2</sub> S NWs on Cu Foam<br>(Cu <sub>2</sub> S/Cu) | 0.5 mA cm <sup>-2</sup> | 1 mAh cm <sup>-2</sup> | 150 | 98.9  | 18           |
|                                                            | 1 mA cm <sup>-2</sup>   | 1 mAh cm <sup>-2</sup> | 150 | 95.5  |              |
|                                                            | 3 mA cm <sup>-2</sup>   | 1 mAh cm <sup>-2</sup> | 100 | 92    |              |
| Cu@NPCN                                                    | 1 mA cm <sup>-2</sup>   | 1 mAh cm <sup>-2</sup> | 400 | 99    | 19           |
|                                                            | 3 mA cm <sup>-2</sup>   | 1 mAh cm <sup>-2</sup> | 250 | 98.2  |              |
| Deposition-regulating Scaffold<br>(DRS)                    | 1 mA cm <sup>-2</sup>   | 1 mAh cm <sup>-2</sup> | 500 | 98.1  | 20           |
|                                                            | 0.5 mA cm <sup>-2</sup> | 2 mAh cm <sup>-2</sup> | 350 | 97    |              |
| 3D Porous Cu (P-Cu)                                        | 2 mA cm <sup>-2</sup>   | 2 mAh cm <sup>-2</sup> | 200 | 97.6  | 21           |
|                                                            | 2 mA cm <sup>-2</sup>   | 4 mAh cm <sup>-2</sup> | 62  | 97.1  |              |
|                                                            | 1 mA cm <sup>-2</sup>   | 3 mAh cm <sup>-2</sup> | 385 | 98    |              |
|                                                            | 3 mA cm <sup>-2</sup>   | 3 mAh cm <sup>-2</sup> | 68  | 97.2  |              |
| Ni <sub>x</sub> N layer on Nickel Foam<br>(PNNF)           | 1 mA cm <sup>-2</sup>   | 1 mAh cm <sup>-2</sup> | 300 | 97    | 22           |
|                                                            | 2 mA cm <sup>-2</sup>   | 1 mAh cm <sup>-2</sup> | 150 | 98.6  |              |
|                                                            | 5 mA cm <sup>-2</sup>   | 1 mAh cm <sup>-2</sup> | 100 | 95.6  |              |
| 3D Hollow Porous Cu Fibers<br>(3D-HPCF)                    | 0.5 mA cm <sup>-2</sup> | 1 mAh cm <sup>-2</sup> | 350 | 99.21 | 23           |
|                                                            | 1 mA cm <sup>-2</sup>   | 1 mAh cm <sup>-2</sup> | 300 | 97.8  |              |
|                                                            | 3 mA cm <sup>-2</sup>   | 1 mAh cm <sup>-2</sup> | 150 | 97.26 |              |
| 3D Cu-Cu <sub>x</sub> O                                    | 1 mA cm <sup>-2</sup>   | 1 mAh cm <sup>-2</sup> | 350 | 99.5  | This<br>Work |
|                                                            | 2 mA cm <sup>-2</sup>   | 2 mAh cm <sup>-2</sup> | 215 | 99.3  |              |
|                                                            | 3 mA cm <sup>-2</sup>   | 1 mAh cm <sup>-2</sup> | 170 | 99.2  |              |
|                                                            | 5 mA cm <sup>-2</sup>   | 1 mAh cm <sup>-2</sup> | 100 | 99.0  |              |

**Video S1.** The Li-infusing experiment of Cu foam.

**Video S2.** The Li-infusing experiment of the Cu-Cu<sub>x</sub>O host.

**Video S3.** In-situ optical microscopy observation of Li deposition on Cu foam under the current density of 0.5 mA (64 times speed playback).

**Video S4.** In-situ optical microscopy observation of Li deposition on the Cu-Cu<sub>x</sub>O host under the current density of 0.5 mA (64 times speed playback).

## References

- 1 L. L. Lu, J. Ge, J. N. Yang, S. M. Chen, H. B. Yao, F. Zhou, S. H. Yu, *Nano Lett.* 2016, **16**, 4431.
- 2 Q. Yun, Y. B. He, W. Lv, Y. Zhao, B. Li, F. Kang, Q. H. Yang, *Adv. Mater.* 2016, **28**, 6932.
- 3 H. Ye, S. Xin, Y. X. Yin, J. Y. Li, Y. G. Guo, L. J. Wan, *J. Am. Chem. Soc.* 2017, **139**, 5916.
- 4 K. Liu, Z. H. Li, W. F. Xie, J. B. Li, D. M. Rao, M. F. Shao, B. S. Zhang, M. Wei, *Energy Storage Mater.* 2018, **15**, 308.

- 5 L. Liu, Y. X. Yin, J. Y. Li, Y. G. Guo, L. J. Wan, *Chem. Commun.* 2018, **54**, 5330.
- 6 S. Liu, X. Zhang, R. Li, L. Gao, J. Luo, *Energy Storage Mater.* 2018, **14**, 143.
- 7 F. H. Ren, Z. Y. Lu, H. Zhang, L. Y. Huai, X. C. Chen, S. D. Wu, Z. Peng, D. Y. Wang, J. C. Ye, *Adv. Funct. Mater.* 2018, **28**, 1805638.
- 8 F. Shen, F. Zhang, Y. Zheng, Z. Fan, Z. Li, Z. Sun, Y. Xuan, B. Zhao, Z. Lin, X. Gui, X. Han, Y. Cheng, C. Niu, *Energy Storage Mater.* 2018, **13**, 323.
- 9 Y. Wang, Z. Wang, D. Lei, W. Lv, Q. Zhao, B. Ni, Y. Liu, B. Li, F. Kang, Y. B. He, *ACS Appl. Mater. Interfaces* 2018, **10**, 20244.
- 10 S. Wu, Z. Zhang, M. Lan, S. Yang, J. Cheng, J. Cai, J. Shen, Y. Zhu, K. Zhang, W. Zhang, *Adv. Mater.* 2018, **30**, 1705830.
- 11 G. H. Yang, J. D. Chen, P. T. Xiao, P. O. Agboola, I. Shakir, Y. X. Xu, *J. Mater. Chem. A* 2018, **6**, 9899.
- 12 C. Zhang, W. Lv, G. M. Zhou, Z. J. Huang, Y. B. Zhang, R. Y. Lyu, H. L. Wu, Q. B. Yun, F. Y. Kang, Q. H. Yang, *Adv. Energy Mater.* 2018, **8**, 1703404.
- 13 R. Zhang, S. W. Wen, N. Wang, K. Q. Qin, E. Z. Liu, C. S. Shi, N. Q. Zhao, *Adv. Energy Mater.* 2018, **8**, 1800914.
- 14 H. Zhao, D. N. Lei, Y. B. He, Y. F. Yuan, Q. B. Yun, B. Ni, W. Lv, B. H. Li, Q. H. Yang, F. Y. Kang, J. Lu, *Adv. Energy Mater.* 2018, **8**, 1800266.
- 15 Y. F. Cheng, X. Ke, Y. M. Chen, X. Y. Huang, Z. C. Shi, Z. P. Guo, *Nano Energy* 2019, **63**, 103854.
- 16 K. Huang, Z. Li, Q. J. Xu, H. M. Liu, H. X. Li, Y. G. Wang, *Adv. Energy Mater.* 2019, **9**, 1900853.
- 17 S. Huang, H. Yang, J. Hu, Y. Liu, K. Wang, H. Peng, H. Zhang, L. Z. Fan, *Small* 2019, **15**, 1904216.
- 18 Z. J. Huang, C. Zhang, W. Lv, G. M. Zhou, Y. B. Zhang, Y. Q. Deng, H. L. Wu, F. Y. Kang, Q. H. Yang, *J. Mater. Chem. A* 2019, **7**, 727.
- 19 F. Pei, A. Fu, W. Ye, J. Peng, X. Fang, M. S. Wang, N. Zheng, *ACS Nano* 2019, **13**, 8337.
- 20 J. Pu, J. Li, K. Zhang, T. Zhang, C. Li, H. Ma, J. Zhu, P. V. Braun, J. Lu, H. Zhang, *Nat. Commun.* 2019, **10**, 1896.
- 21 L.-M. Wang, Z.-F. Tang, J. Lin, X.-D. He, C.-S. Chen, C.-H. Chen, *J. Mater. Chem. A* 2019, **7**, 17376.
- 22 J. F. Zhu, J. Chen, Y. Luo, S. Q. Sun, L. G. Qin, H. Xu, P. G. Zhang, W. Zhang, W. B. Tian, Z. M. Sun, *Energy Storage Mater.* 2019, **23**, 539.
- 23 L. Zhang, X. Yin, S. Shen, Y. Liu, T. Li, H. Wang, X. Lv, X. Qin, S. W. Chiang, Y. Fu, F. Kang, B. Li, *Nano Lett.* 2020, **20**, 5662.
